# Supplementary material for: Therapeutic properties of a vector carrying the HSV thymidine kinase and GM-CSF genes and delivered as a complex with a cationic copolymer
Source: PubMed Central journal article supplement (PMC4359447; doi:10.1186/s12967-015-0433-0), 2015-03-04
Supplement: 12967_2015_433_MOESM1_ESM.pdf [file 12967_2015_433_MOESM1_ESM.pdf]

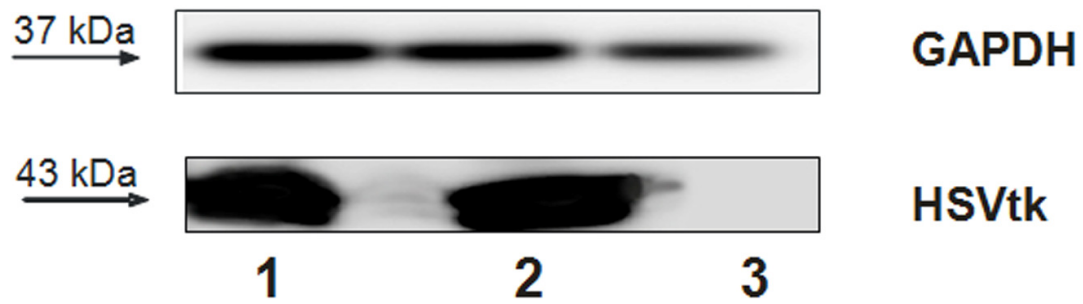

**Figure S1. Production level of HSVtk expressed from the TK and TKmGM constructs transfected with LFA.** Immunoelectrophoretic staining of the HSVtk and GAPDH proteins from HEK293 cells transfected with the TK (1) or TKhGM (2) constructs, 3 – non-transfected cells.
