# Supplementary material for: Therapeutic properties of a vector carrying the HSV thymidine kinase and GM-CSF genes and delivered as a complex with a cationic copolymer
Source: PubMed Central journal article supplement (PMC4359447; doi:10.1186/s12967-015-0433-0), 2015-03-04
Supplement: 12967_2015_433_MOESM4_ESM.pdf [file 12967_2015_433_MOESM4_ESM.pdf]

**Table S2.** *In vivo* cytotoxic effect of TK, mGM and TKmGM complexed with PPT or LFA in combination with or without ganciclovir.

| Constructs and control | Lifespan days | TGD <sub>500</sub> days | FLM % | Volume of lymph nodes, mm <sup>3</sup> | MI, % |
|------------------------|---------------|-------------------------|-------|----------------------------------------|-------|
| TKmGM-LFA/GCV          | 59±13         | 12.4                    | 42*   | 108±72                                 | 81*   |
| TK-LFA/GCV             | 59±24         | 12.7                    | 67    | 167±51                                 | 70*   |
| mGM-LFA/GCV            | 37±9          | 3.2                     | 33*   | 261±79                                 | 54    |
| TKmGM-PPT/GCV          | 60±22         | 14.1                    | 33*   | 100±45                                 | 82*   |
| TK-PPT/GCV             | 57±15         | 11.6                    | 58*   | 186±80                                 | 67*   |
| mGM-PPT/GCV            | 39±13         | 4.1                     | 50*   | 189±91                                 | 66    |
| TKmGM-LFA              | 37±3          | 4.4                     | 50*   | 318±98                                 | 44    |
| TK-LFA                 | 37±4          | 4.3                     | 83    | 452±112                                | 20    |
| mGM- LFA               | 47±6          | 4.2                     | 58*   | 290±142                                | 49    |
| TKmGM-PPT/PBS          | 41±7          | 3.9                     | 42*   | 298±264                                | 47    |
| TK-PPT/PBS             | 38±4          | 2.6                     | 75    | 459±339                                | 18    |
| mGM-PPT/PBS            | 48±4          | 3.0                     | 58*   | 349±242                                | 38    |
| Control/GCV            | 40±3          | 0.3                     | 100   | 457±121                                | 19    |
| Control/PBS            | 35±3          |                         | 100   | 562±316                                |       |

F1 (C57Bl/6jxCBA) female mice (12 animals in each group) were inoculated with sarcoma 37 on day zero. TKmGM (CMV-HSVtk-mGM-CSF-pGL3 construct), TK (CMV-HSVtk-pGL3), mGM (CMV-mGM-CSF-pGL3); PBS – phosphate buffer saline (placebo); GCV – ganciclovir, PPT - polyethylenimine-polyethylene glycol-TAT peptide copolymer, LFA – Lipofectamine-2000. Control – the group that received only GCV or PBS; TGD<sub>500</sub> –tumor growth delay, MI – metastasis process inhibition, mean values, FLM – frequency of lymphogenic metastasis (percentage of animals with metastases in lymph nodes). ILS, MI (compared with the control group of animals that received PBS) and the volume of lymph nodes were measured on day 30 after inoculation. The constructs and control solutions were administered intratumorally with a 5-day interval between administrations. PBS was administered in volumes equivalent to the GCV administration scheme. The PPT concentration in injected solutions of the constructs was 25 µM

\* - statistically significant values (p<0.05).
